# Supplementary material for: Chondrogenic differentiation of adipose-derived mesenchymal stem cells induced by L-ascorbic acid and platelet rich plasma on silk fibroin scaffold
Source: PeerJ. 2018 Nov 19;6:e5809. doi: 10.7717/peerj.5809 (PMC6250097; doi:10.7717/peerj.5809)
Supplement: Supplemental Information 1 — The cells grown on optimized scaffold, which made from 12% w/v Silk Fibroin and had 500 µm pore size on day 1, 3, 5, 7, 14, and 21. Each observational group was quantified triplicate. The growth curves were plotted from the cell viability (y-axis) and observational time (x-axis). The cell viability was obtained from the absorbance value of MTT assay. [file peerj-06-5809-s001.xlsx]

## Sheet: Sheet2
		Read 1	Read 2	Read 3	Read 4	Read 5	Average	Final Average			Average	Final Average	STDEV	STDEV				Average	Final average	STDEV	STDEV
Day 1	control 1	0.426	0.433	0.432	0.429	0.431	0.4302	0.443		control D1	0.2302	0.243	0.0159009	0.0159009		Day 1	Control	0.2302	0.243	0.0159009	0.0159009
	control 2	0.454	0.462	0.463	0.465	0.46	0.4608				0.2608							0.2608
	control 3	0.429	0.441	0.44	0.441	0.439	0.438				0.238							0.238
	1	0.435	0.427	0.427	0.427	0.433	0.4298	0.355267		Day 1	0.2298	0.255267	0.0237456	0.0237456			Scaffold	0.2298	0.255267	0.0237456	0.0237456
	2	0.376	0.375	0.375	0.378	0.38	0.3768				0.2768							0.2768
	3	0.26	0.259	0.258	0.26	0.259	0.2592				0.2592							0.2592
Day 3	Control 1	0.45	0.453	0.454			0.452333	0.479556		control D3	0.452333	0.479556	0.0740213	0.0740213		Day 3	Control	0.452333	0.479556	0.0740213	0.0740213
	control 2	0.419	0.423	0.427			0.423				0.423							0.423
	control 3	0.561	0.564	0.565			0.563333				0.563333							0.563333
	1	0.324	0.331	0.334			0.329667	0.374556		Day 3	0.329667	0.374556	0.0405878	0.0405878			Scaffold	0.329667	0.374556	0.0405878	0.0405878
	2	0.397	0.41	0.419			0.408667				0.408667							0.408667
	3	0.375	0.388	0.393			0.385333				0.385333							0.385333
Day 5	control 1	0.435	0.44	0.443			0.439333	0.438778		control D5	0.439333	0.438778	0.0411695	0.0411695		Day 5	Control	0.439333	0.438778	0.0411695	0.0411695
	control 2	0.477	0.482	0.48			0.479667				0.479667							0.479667
	control 3	0.395	0.399	0.398			0.397333				0.397333							0.397333
	1	0.4	0.406	0.41			0.405333	0.407111		Day 5	0.405333	0.407111	0.0027955	0.0027955			Scaffold	0.405333	0.407111	0.0027955	0.0027955
	2	0.399	0.415	0.417			0.410333				0.410333							0.410333
	3	0.394	0.411	0.412			0.405667				0.405667							0.405667
Day 7	control 1	0.22	0.219	0.22	0.22		0.21975	0.491333		control D7	0.21975	0.491333	0.239255	0.239255		Day 7	Control	0.21975	0.491333	0.239255	0.239255
	control 2	0.58	0.588	0.585	0.58		0.58325				0.58325							0.58325
	control 3	0.676	0.666	0.666	0.676		0.671				0.671							0.671
	1	0.378	0.374	0.358	0.378		0.372	0.48725		Day 7	0.372	0.48725	0.101578	0.101578			Scaffold	0.372	0.48725	0.101578	0.101578
	2	0.524	0.527	0.529	0.524		0.526				0.526							0.526
	3	0.55	0.574	0.581	0.55		0.56375				0.56375							0.56375
Day 14	control 1	0.618	0.623	0.629	0.635	0.64	0.629	0.545533		control D14	0.629	0.545533	0.088006	0.088006		Day 14	Control	0.629	0.545533	0.088006	0.088006
	control 2	0.435	0.446	0.456	0.464	0.467	0.4536				0.4536							0.4536
	control 3	0.544	0.553	0.556	0.554	0.563	0.554				0.554							0.554
	1	0.612	0.634	0.635	0.636	0.639	0.6312	0.648667		Day 14	0.6312	0.648667	0.0403432	0.0403432			Scaffold	0.6312	0.648667	0.0403432	0.0403432
	2	0.698	0.695	0.692	0.693	0.696	0.6948				0.6948							0.6948
	3	0.609	0.621	0.62	0.624	0.626	0.62				0.62							0.62
																Day 21	Control	1.281	1.18867	0.0973362	0.0850078
																		1.198
																		1.087
																	Scaffold	1.614	1.686	0.35945	0.494856
																		1.368
																		2.076
																				Day 1	Control D1	0.243	1.05048
																					scaffold D1	0.255267
																				Day 3	Control D3	0.479556	0.781047
																					scaffold D3	0.374556
																				Day 5	Control D5	0.438778	0.92783
																					scaffold D5	0.407111
																				Day 7	Control D7	0.491333	0.991689
																					scaffold D7	0.48725
																				Day 14	Control D14	0.545533	1.18905
																					scaffold D14	0.648667
																				Day 21	Control D21	1.18867	1.4184
																					scaffold D21	1.686
