# Supplementary material for: Chondrogenic differentiation of adipose-derived mesenchymal stem cells induced by L-ascorbic acid and platelet rich plasma on silk fibroin scaffold
Source: PeerJ. 2018 Nov 19;6:e5809. doi: 10.7717/peerj.5809 (PMC6250097; doi:10.7717/peerj.5809)
Supplement: Supplemental Information 3 — The blue color intensity was obtained from the absorbance value (y-axis) exported from Biorad iMark. There are 5 groups in LAA optimization process and 4 groups in PRP optimization process. Each group was repeated triplicate. [file peerj-06-5809-s003.xlsx]

## Sheet: Sheet1
							Average	stdev
Control	0.219	0.158	0.19	0.309	0.286	0.284	0.241	0.0607816
LAA 25µg/mL	0.1973	0.1848	0.1667	0.33	0.29	0.325	0.248967	0.0742776
LAA 50µg/mL	0.39	0.33	0.32	0.38	0.34	0.38	0.356667	0.0301109
LAA 100µg/mL	0.3039	0.308	0.278	0.36	0.35	0.339	0.32315	0.0315236
LAA 200µg/mL	0.36	0.31	0.37	0.29	0.35	0.3	0.33	0.0340588
PRP 5%	0.26	0.29	0.27	0.26	0.28	0.26	0.27	0.0126491
PRP 10%	0.47	0.5	0.45	0.4	0.43	0.48	0.455	0.0361939
PRP 20%	0.45	0.46	0.459	0.43	0.41	0.39	0.433167	0.0285686
