# Supplementary material for: Chondrogenic differentiation of adipose-derived mesenchymal stem cells induced by L-ascorbic acid and platelet rich plasma on silk fibroin scaffold
Source: PeerJ. 2018 Nov 19;6:e5809. doi: 10.7717/peerj.5809 (PMC6250097; doi:10.7717/peerj.5809)
Supplement: Supplemental Information 5 — To optimize the optimum LAA and PRP concentration, the ADSC were grown on LAA supplemented medium and PRP supplemented medium. The growth curves were plotted from the cell viability (y-axis) and observational time (x-axis). The cell viability was obtained from the absorbance value of MTT assay. Each observational group was quantified triplicate. [file peerj-06-5809-s005.xlsx]

## Sheet: Graph
Day 1	FBS				2.5				5				10				20				0.05				0.1				0.2
1	0.102	0.103	0.103	0.102667	0.073	0.075	0.075	0.0743333	0.092	0.091	0.093	0.092	0.073	0.074	0.075	0.074	0.059	0.061	0.062	0.0606667	0.083	0.084	0.084	0.0836667	0.112	0.116	0.116	0.114667	0.074	0.076	0.075	0.075
2	0.099	0.102	0.101	0.100667	0.076	0.077	0.077	0.0766667	0.106	0.109	0.109	0.108	0.078	0.08	0.08	0.0793333	0.059	0.059	0.06	0.0593333	0.071	0.072	0.072	0.0716667	0.194	0.2	0.2	0.198	0.078	0.08	0.081	0.0796667
3	0.1	0.101	0.102	0.101	0.091	0.092	0.092	0.0916667	0.11	0.111	0.111	0.110667	0.066	0.071	0.071	0.0693333	0.068	0.07	0.071	0.0696667	0.077	0.077	0.077	0.077	0.09	0.092	0.092	0.0913333	0.083	0.084	0.085	0.084
				0.101444				0.0808889				0.103556				0.0742222				0.0632222				0.0774444				0.134667				0.0795556
Day 3	FBS				2.5				5				10				20				0.05				0.1				0.2
1	0.119	0.122	0.12	0.120333	0.136	0.139	0.138	0.137667	0.288	0.294	0.295	0.292333	0.142	0.145	0.144	0.143667	0.155	0.154	0.15	0.153	0.157	0.16	0.162	0.159667	0.231	0.235	0.234	0.233333	0.137	0.139	0.139	0.138333
2	0.113	0.114	0.113	0.113333	0.124	0.126	0.124	0.124667	0.21	0.215	0.213	0.212667	0.169	0.171	0.169	0.169667	0.145	0.146	0.144	0.145	0.153	0.155	0.155	0.154333	0.302	0.31	0.311	0.307667	0.207	0.211	0.21	0.209333
3	0.167	0.171	0.169	0.169	0.146	0.149	0.147	0.147333	0.145	0.147	0.146	0.146	0.169	0.172	0.172	0.171	0.161	0.16	0.154	0.158333	0.171	0.171	0.168	0.17	0.238	0.235	0.234	0.235667	0.2	0.199	0.199	0.199333
				0.134222				0.136556				0.217				0.161444				0.152111				0.161333				0.258889				0.182333
Day 5	FBS				2.5				5				10				20				0.05				0.1				0.2
1	0.21	0.211		0.2105	0.209	0.21		0.2095	0.23	0.237		0.2335	0.255	0.261		0.258	0.189	0.188		0.1885	0.281	0.285		0.283	0.481	0.49		0.4855	0.304	0.311		0.3075
2	0.174	0.174		0.174	0.226	0.23		0.228	0.285	0.284		0.2845	0.244	0.25		0.247	0.226	0.229		0.2275	0.258	0.262		0.26	0.611	0.616		0.6135	0.295	0.297		0.296
3	0.198	0.196		0.197	0.227	0.232		0.2295	0.238	0.239		0.2385	0.261	0.263		0.262	0.223	0.227		0.225	0.269	0.274		0.2715	0.484	0.474		0.479	0.246	0.251		0.2485
				0.193833				0.222333				0.252167				0.255667				0.213667				0.2715				0.526				0.284
Day 7	FBS				2.5				5				10				20				0.05				0.1				0.2
1	0.153	0.155	0.155	0.154333	0.477	0.478	0.479	0.478	0.479	0.487	0.491	0.485667	0.327	0.326	0.326	0.326333	0.351	0.351	0.352	0.351333	0.777	0.778	0.776	0.777	1.463	1.465	1.463	1.46367	0.845	0.844	0.837	0.842
2	0.272	0.273	0.272	0.272333	0.575	0.578	0.577	0.576667	0.504	0.509	0.507	0.506667	0.338	0.338	0.338	0.338	0.298	0.298	0.305	0.300333	0.76	0.765	0.766	0.763667	1.271	1.269	1.256	1.26533	1.168	1.168	1.16	1.16533
3	0.25	0.25	0.248	0.249333	0.578	0.579	0.579	0.578667	0.428	0.428	0.427	0.427667	0.353	0.351	0.348	0.350667	0.326	0.326	0.325	0.325667	0.662	0.659	0.652	0.657667	1.122	1.129	1.13	1.127	1.172	1.177	1.176	1.175
				0.225333				0.544444				0.473333				0.338333				0.325778				0.732778				1.28533				1.06078
Day 14	FBS				2.5				5				10				20				0.05				0.1				0.2
1	0.26	0.262	0.263	0.261667	0.605	0.61	0.614	0.609667	0.521	0.522	0.531	0.524667	0.137	0.139	0.142	0.139333	0.531	0.45	0.49	0.490333	0.643	0.65	0.655	0.649333	1.489	1.494	1.499	1.494	0.962	0.954	0.946	0.954
2	0.208	0.212	0.204	0.208	0.604	0.609	0.61	0.607667	0.595	0.594	0.591	0.593333	0.562	0.581	0.586	0.576333	0.632	0.644	0.651	0.642333	0.741	0.747	0.728	0.738667	1.264	1.269	1.289	1.274	1.077	1.036	1.019	1.044
3	0.317	0.312	0.302	0.310333	0.621	0.624	0.628	0.624333	0.571	0.551	0.54	0.554	0.615	0.633	0.645	0.631	0.506	0.509	0.514	0.509667	0.974	0.958	0.954	0.962	1.088	1.072	1.055	1.07167	0.961	0.973	0.981	0.971667
				0.26				0.613889				0.557333				0.448889				0.547444				0.783333				1.27989				0.989889
Day 21	FBS				2.5				5				10				20				0.05				0.1				0.2
1	0.392	0.4	0.399	0.397	0.609	0.632	0.634	0.625	0.837	0.839	0.841	0.839	0.542	0.548	0.546	0.545333	0.503	0.517	0.526	0.515333	1.117	1.11	1.113	1.11333	1.829	1.841	1.836	1.83533	1.47	1.454	1.452	1.45867
2	0.329	0.328	0.33	0.329	0.712	0.704	0.707	0.707667	0.8	0.803	0.805	0.802667	0.577	0.581	0.584	0.580667	0.535	0.523	0.52	0.526	1.191	1.198	1.194	1.19433	1.721	1.705	1.699	1.70833	1.246	1.284	1.29	1.27333
3	0.306	0.309	0.309	0.308	0.752	0.76	0.759	0.757	0.749	0.752	0.753	0.751333	0.489	0.491	0.493	0.491	0.582	0.585	0.585	0.584	1.106	1.126	1.123	1.11833	1.58	1.561	1.555	1.56533	1.329	1.336	1.337	1.334
				0.344667				0.696556				0.797667				0.539				0.541778				1.142				1.703				1.35533
		Day1	Day3	Day5	Day7	Day14	Day21			Day1	Day3	Day5	Day7	Day14	Day21
	FBS	0.101444	0.134222	0.193833	0.225333	0.26	0.344667		25µg/mL	79.7371	101.738	114.703	241.617	236.111	202.095
	25µg/mL	0.0808889	0.136556	0.222333	0.544444	0.613889	0.696556		50µg/mL	102.081	161.672	130.095	210.059	214.359	231.431
	50µg/mL	0.103556	0.217	0.252167	0.473333	0.557333	0.797667		100µg/mL	73.1654	120.281	131.9	150.148	172.65	156.383
	100µg/mL	0.0742222	0.161444	0.255667	0.338333	0.448889	0.539		200µg/mL	62.322	113.328	110.232	144.576	210.556	157.189
	200µg/mL	0.0632222	0.152111	0.213667	0.325778	0.547444	0.541778		Dibanding kontrol (% viability - LAA)
		Day1	Day3	Day5	Day7	Day14	Day21			Day1	Day3	Day5	Day7	Day14	Day21
	FBS	0.101444	0.134222	0.193833	0.225333	0.26	0.344667		PRP 5%	76.3417	120.199	140.069	325.197	301.282	331.335
	PRP 5%	0.0774444	0.161333	0.2715	0.732778	0.783333	1.142		PRP 10%	132.749	192.881	271.367	570.414	492.265	494.101
	PRP 10%	0.134667	0.258889	0.526	1.28533	1.27989	1.703		PRP 20%	78.4228	135.844	146.518	470.759	380.726	393.23
	PRP 20%	0.0795556	0.182333	0.284	1.06078	0.989889	1.35533		Dibanding kontrol (% viability - PRP)
